# Supplementary material for: Highly efficient CRISPR-Cas9-mediated editing identifies novel mechanosensitive microRNA-140 targets in primary human articular chondrocytes
Source: PubMed Central journal article supplement (PMC8987936; doi:10.1016/j.joca.2022.01.005), 2022-04
Supplement: mmc1.pdf [file mmc1.pdf]

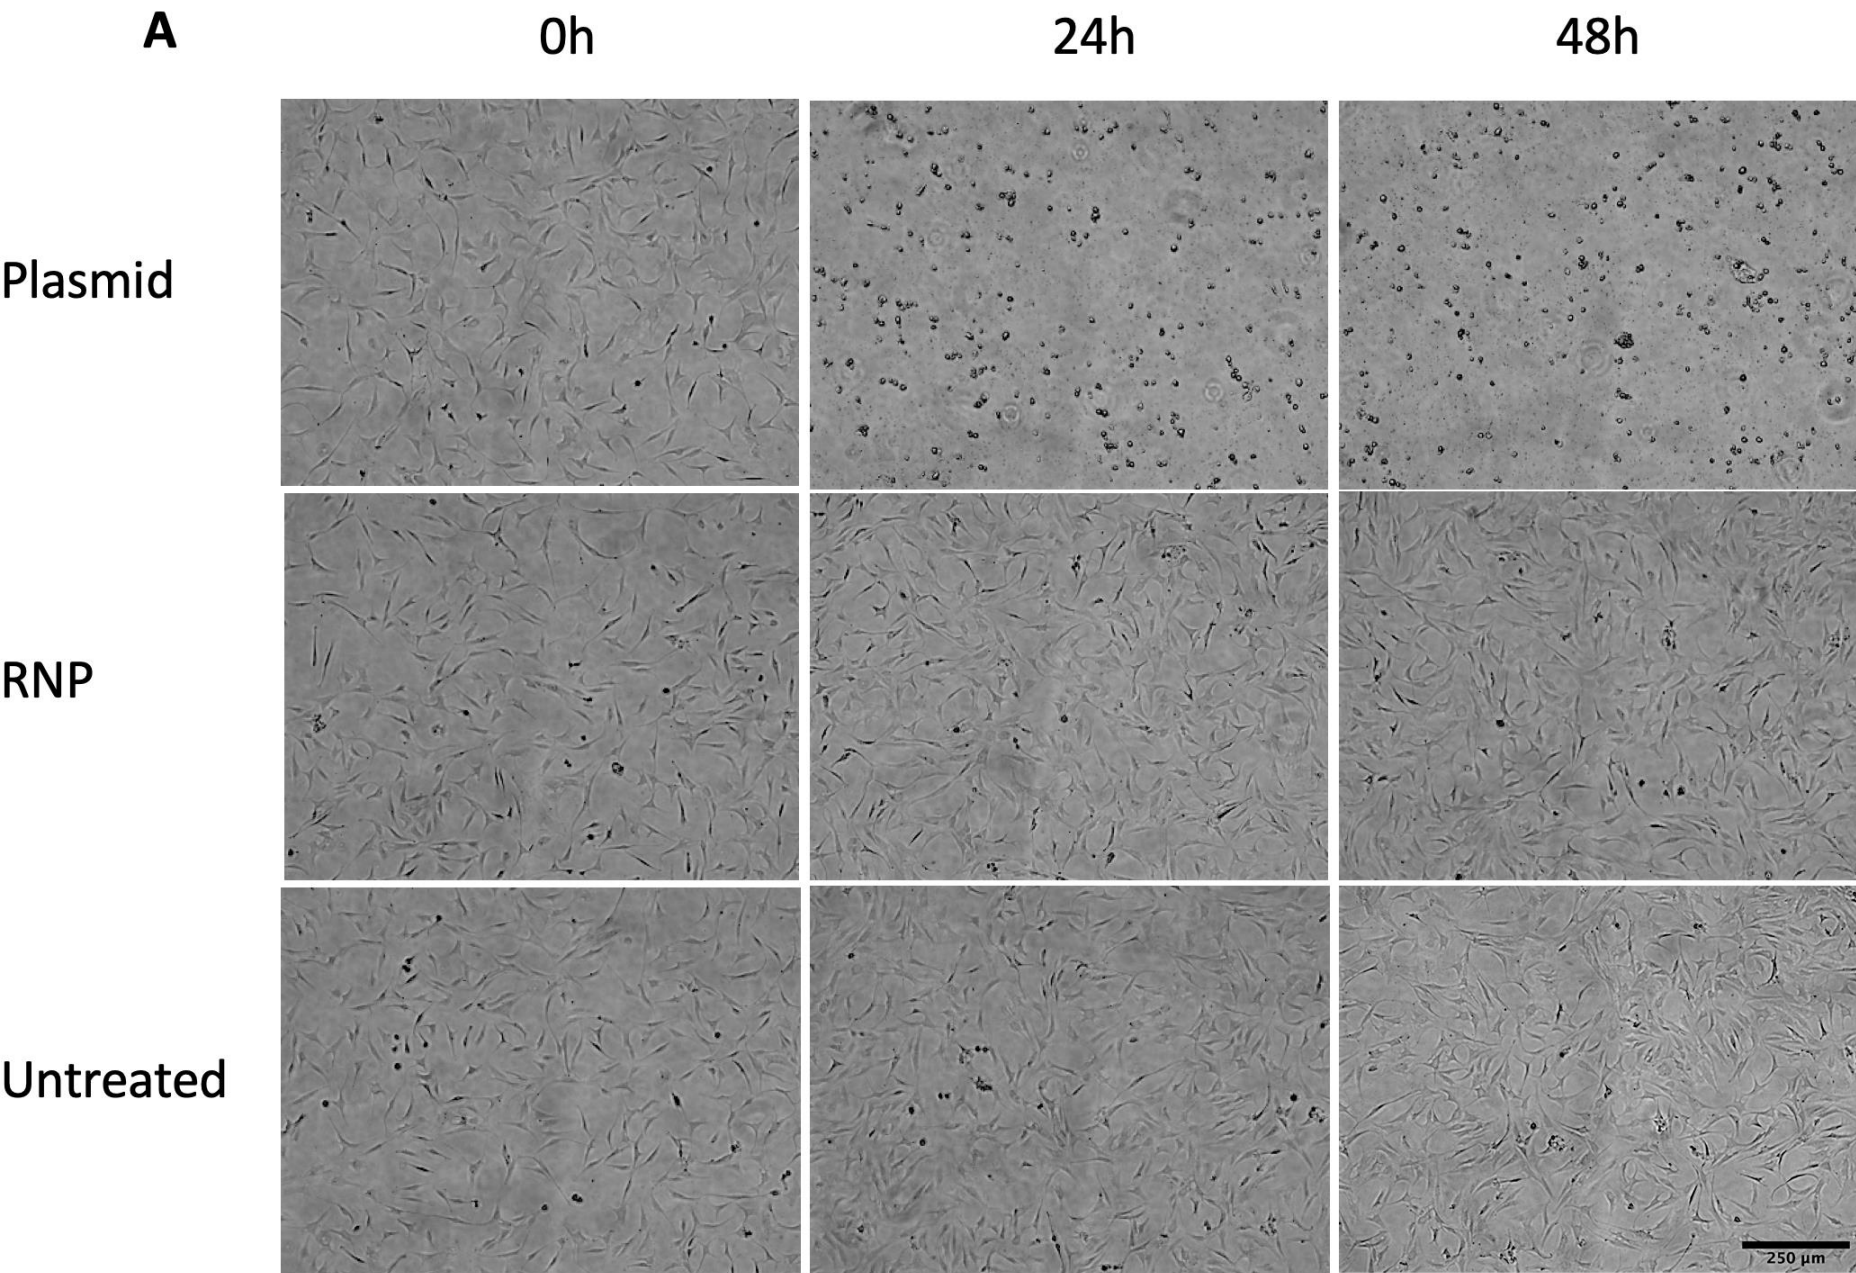

**B**                      Cell death 24h post transfection

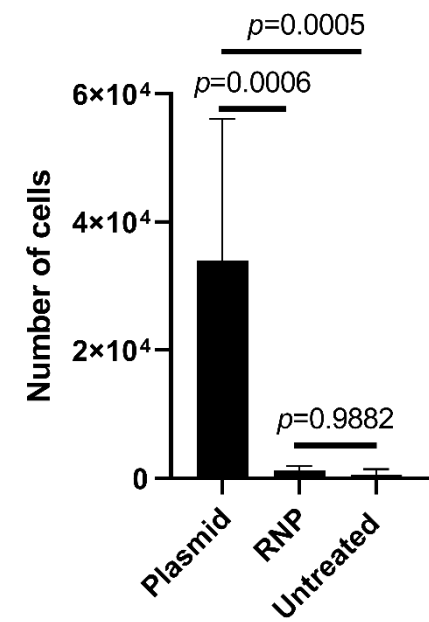

**C**

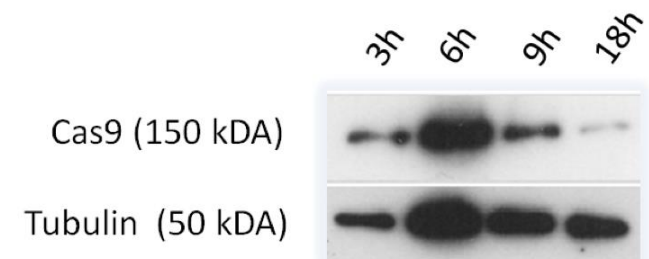

Supplementary Figure 1
