# Supplementary material for: Highly efficient CRISPR-Cas9-mediated editing identifies novel mechanosensitive microRNA-140 targets in primary human articular chondrocytes
Source: PubMed Central journal article supplement (PMC8987936; doi:10.1016/j.joca.2022.01.005), 2022-04
Supplement: mmc4.pdf [file mmc4.pdf]

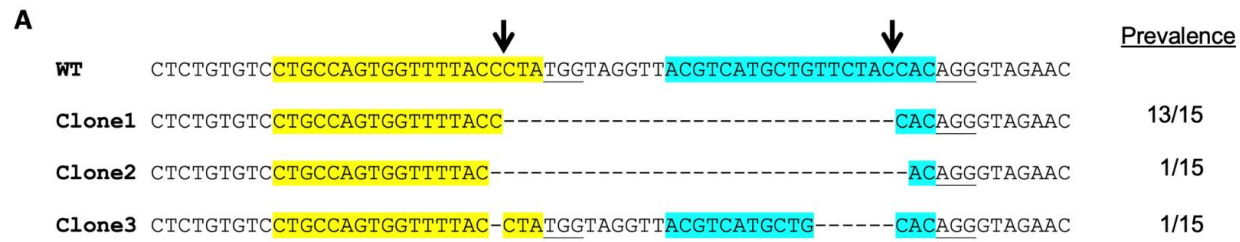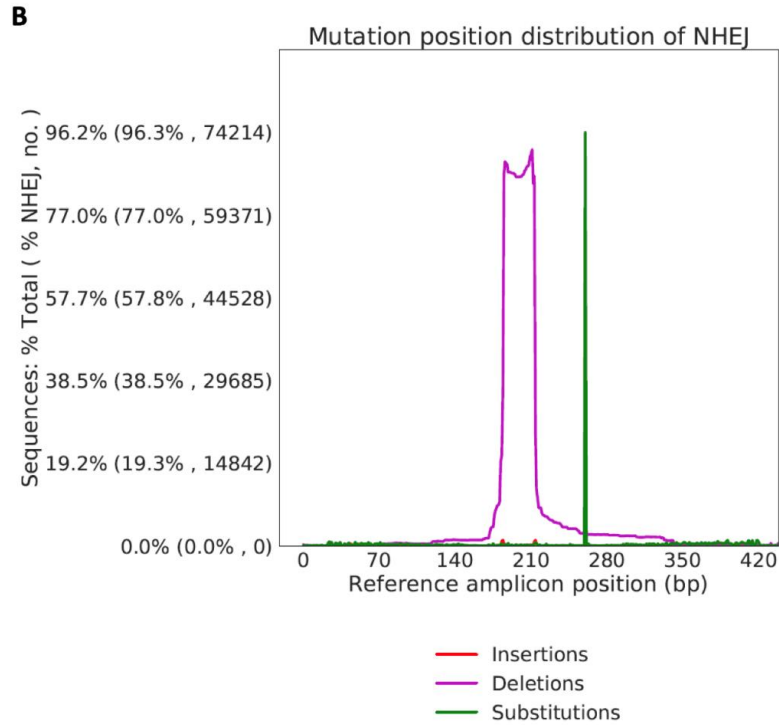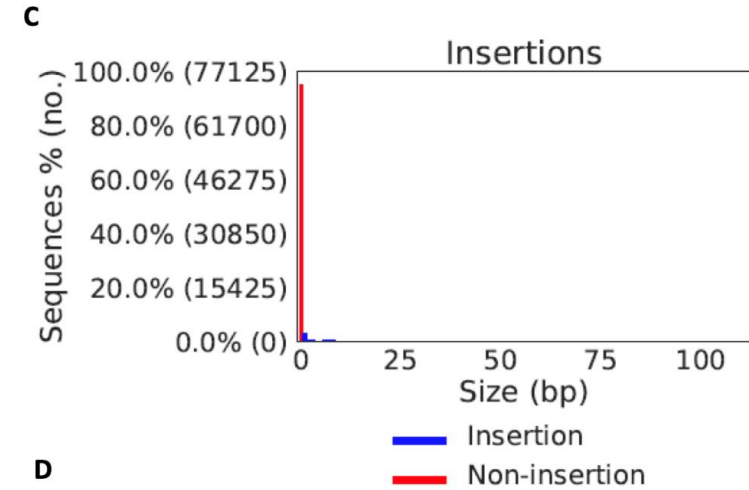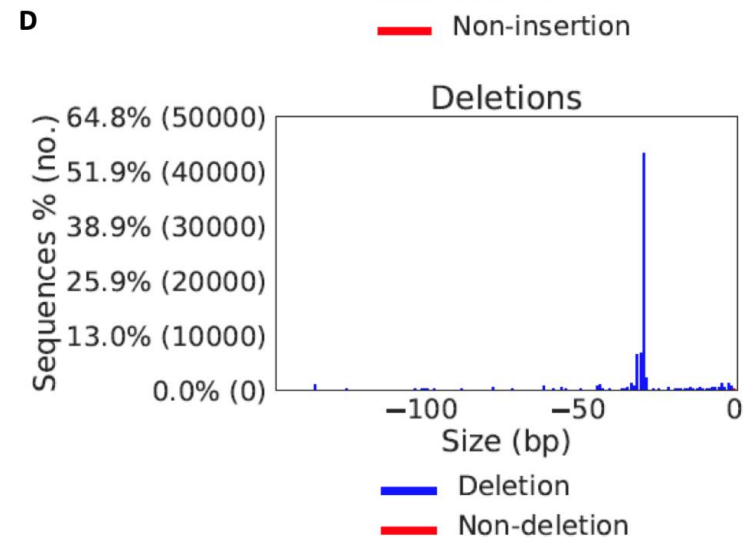

**E**

|            | Reads (in absolute numbers) | Percentage % |
|------------|-----------------------------|--------------|
| Modified   | 77.094                      | > 99.9       |
| Unmodified | 31                          | < 0.01       |

Supplementary Figure 4
